# Supplementary material for: Simple and fast determination of catecholamines in pharmaceutical samples using Ag+–3,3′,5,5′-tetramethylbenzidine as a colorimetric probe
Source: Royal Society of Chemistry journal article supplement (doi:10.1039/c5ay01353d), 2015-01-01
Supplement: c5ay01353d1.pdf [file c5ay01353d1.pdf]

## Electronic Supplementary Information

Simple and fast determination of catecholamines in pharmaceutical samples using  $\text{Ag}^+$ -3,3',5,5'-tetramethylbenzidine as a colorimetric probe

Shuyun Zhu <sup>a</sup>, Jing Yang <sup>a</sup>, Xian-en Zhao <sup>a\*</sup>, Rongmei Kong <sup>a</sup>, Hua Wang <sup>a</sup>, and

Jinmao You <sup>a,b\*</sup>

<sup>a</sup> Shandong Provincial Key Laboratory of Life-Organic Analysis, College of Chemistry and Chemical Engineering, Qufu Normal University, Qufu, Shandong, 273165, China.

<sup>b</sup> Key Laboratory of Tibetan Medicine Research, Northwest Institute of Plateau Biology, University of Chinese Academy of Sciences, Xining, Qinghai, 810001, China.

\* To whom correspondence should be addressed. Tel/Fax: (+86)-537-4456305; E-mail: xianenzhao@163.com (X. Zhao); jmyou6304@163.com (J. You).

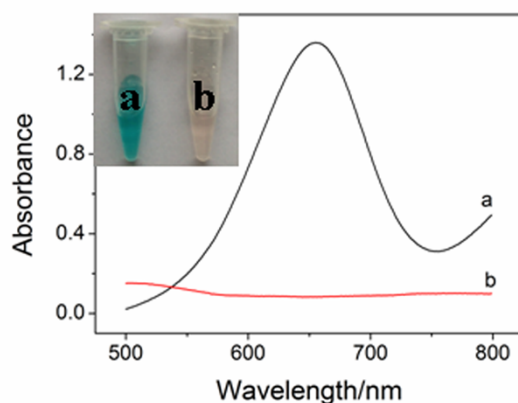

**Fig. S1** Typical UV-vis absorption spectra of  $\text{Ag}^+$ -TMB solution in the absence (a) and the presence of 50  $\mu\text{M}$  EP (b). Inset shows the corresponding digital images.

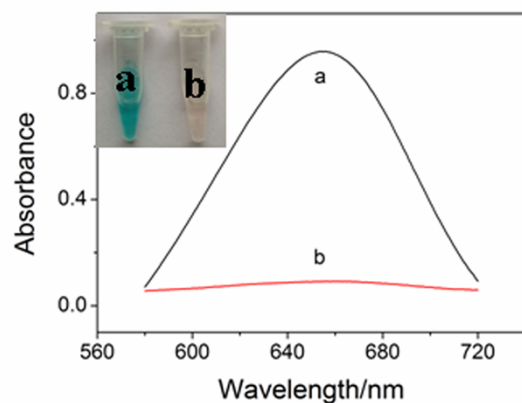

**Fig. S2** Typical UV-vis absorption spectra of  $\text{Ag}^+$ -TMB solution in the absence (a) and the presence of  $100 \mu\text{M}$  NE (b). Inset shows the corresponding digital images.

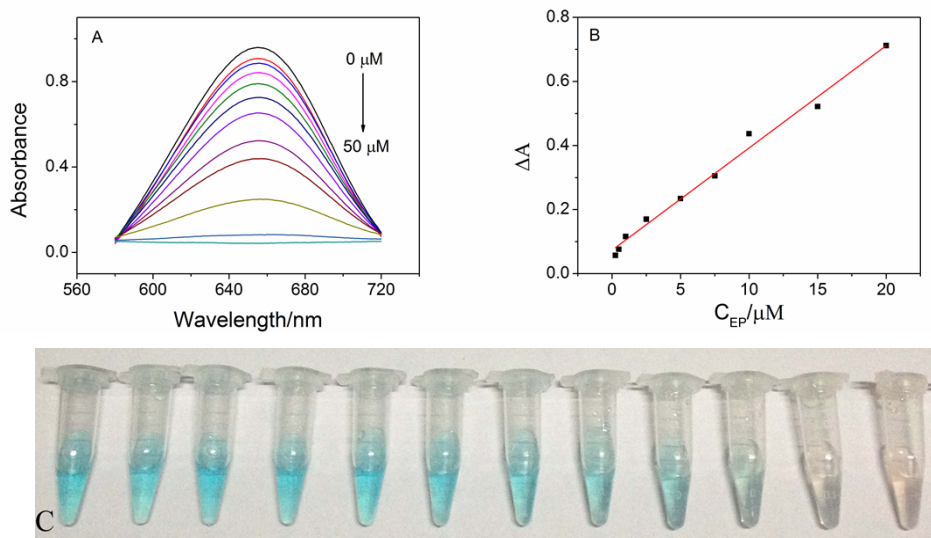

**Fig. S3** (A) Typical UV-vis spectra of the proposed method in the absence and presence of different amounts of EP, from top to down: the concentration of EP is 0, 0.25, 0.5, 1.0, 2.5, 5.0, 7.5, 10, 15, 20, 30, and  $50 \mu\text{M}$ . (B) Relationship between the  $\Delta A$  and the EP concentration. (C) Photographs of  $\text{Ag}^+$ -TMB solution in the absence and presence of different amounts of EP.

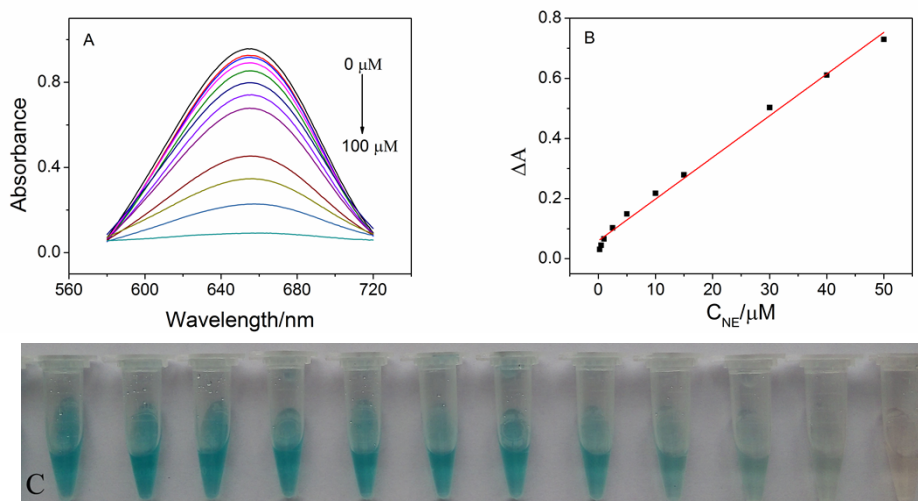

**Fig. S4** (A) Typical UV-vis spectra of the proposed method in the absence and presence of different amounts of NE, from top to down: the concentration of NE is 0, 0.25, 0.5, 1.0, 2.5, 5.0, 7.5, 10, 15, 30, 40, 50, and 100 μM. (B) Relationship between the  $\Delta A$  and the NE concentration. (C) Photographs of  $\text{Ag}^+$ -TMB solution in the absence and presence of different amounts of NE.

**Table S1** The determination of DA, EP, and NE in their injections.

| Analyte | Amount added<br>( $\mu\text{M}$ ) | Amount found<br>( $\mu\text{M}$ ) | Recovery (%) | RSD (n=6; %) |
|---------|-----------------------------------|-----------------------------------|--------------|--------------|
| DA      | 0.00                              | 0.46                              | -            | 3.33         |
|         | 0.50                              | 1.01                              | 110          | 3.45         |
|         | 5.00                              | 5.32                              | 97.2         | 2.56         |
| EP      | 0.00                              | 1.04                              | -            | 3.67         |
|         | 1.00                              | 2.10                              | 106          | 3.49         |
|         | 5.00                              | 5.83                              | 95.8         | 3.12         |
| NE      | 0.00                              | 1.07                              | -            | 4.12         |
|         | 1.00                              | 2.12                              | 105          | 3.89         |
|         | 5.00                              | 5.76                              | 93.8         | 2.87         |
